# Supplementary material for: Multiple Early Life Stressors as Risk Factors for Neurodevelopmental Abnormalities in the F1 Wistar Rats
Source: MDPI journal article supplement (doi:10.3390/brainsci13101360), 2023-09-22
Supplement: s1 [file s1]

**Table S1.** Detailed composition of low protein (LP; 8% protein) and normal control (NC; 20% protein) experimental diets.

| <b>S. No.</b> | <b>Constituents of Diet</b> | <b>8% protein<br/>(LP)</b> | <b>20% protein<br/>(NC)</b> |
|---------------|-----------------------------|----------------------------|-----------------------------|
| 1.            | Wheat                       | 56.20%                     | 22.50%                      |
| 2.            | Bengal gram                 | 0                          | 60.00%                      |
| 3.            | Groundnut oil               | 3.00%                      | 4.00%                       |
| 4.            | Soyabean oil                | 3.00%                      | 0                           |
| 5.            | Casein                      | 0                          | 4.00%                       |
| 6.            | Skimmed milk powder         | 6.00%                      | 5.00%                       |
| 7.            | Vitamin mixture             | 0.50%                      | 0.50%                       |
| 8.            | Mineral mixture             | 0.50%                      | 0.40%                       |
| 9.            | Starch                      | 23.90%                     | 0                           |
| 10.           | Sodium chloride             | 0.30%                      | 0                           |
| 11.           | Di calcium phosphate        | 0.40%                      | 0                           |
| 12.           | Calcium carbonate           | 0.90%                      | 0                           |
| 13.           | Choline chloride            | 0.20%                      | 0                           |
| 14.           | L-Cysteine                  | 0.10%                      | 0                           |
